# Supplementary material for: Bayesian analysis and prediction of hybrid performance
Source: PubMed Central journal article supplement (PMC6366084; doi:10.1186/s13007-019-0388-x), 2019-02-07

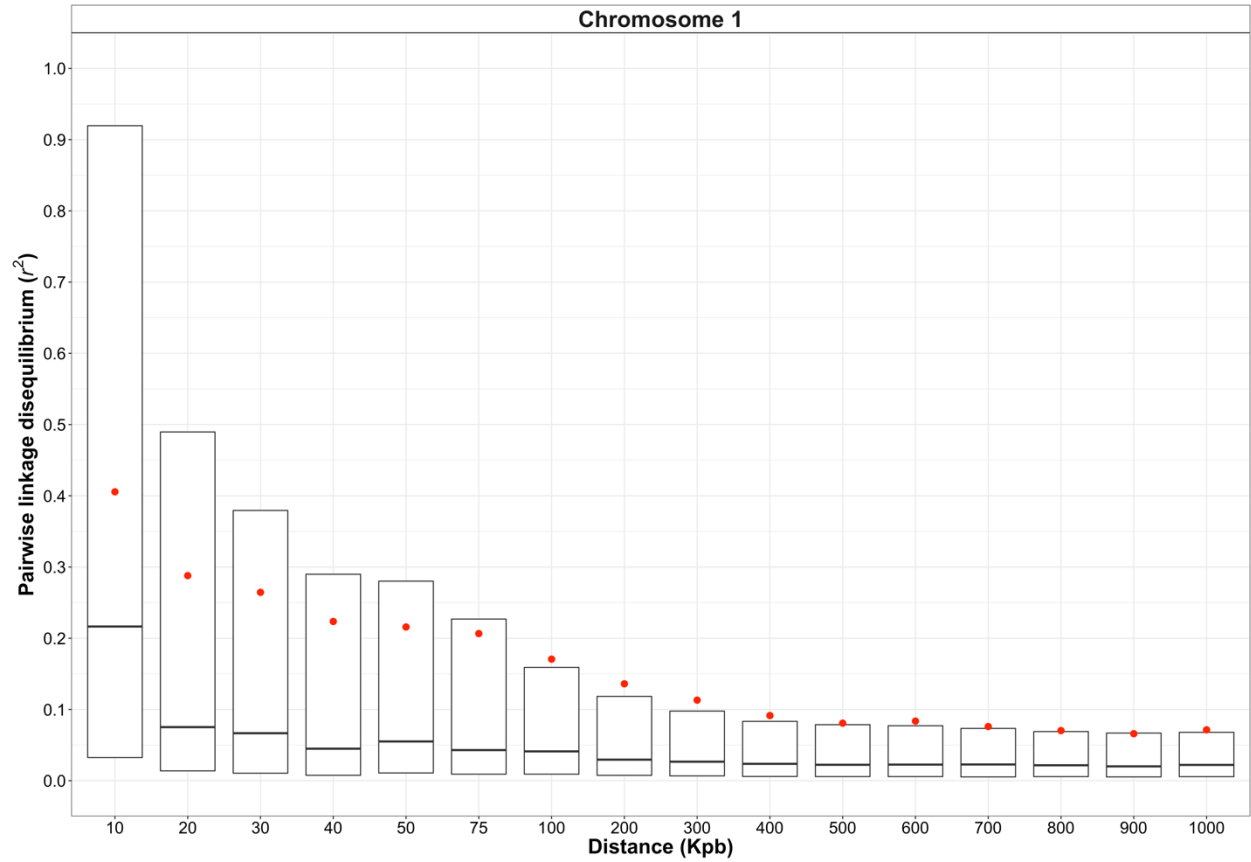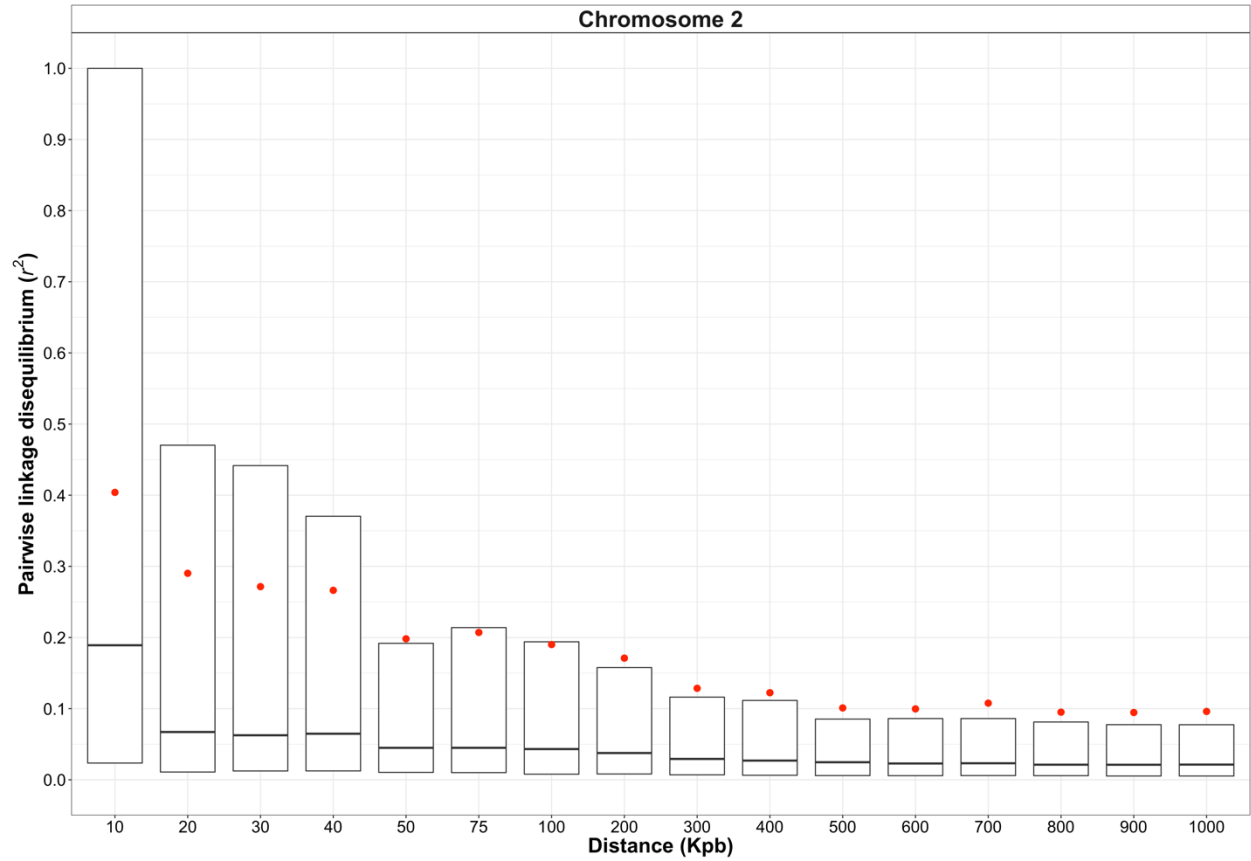

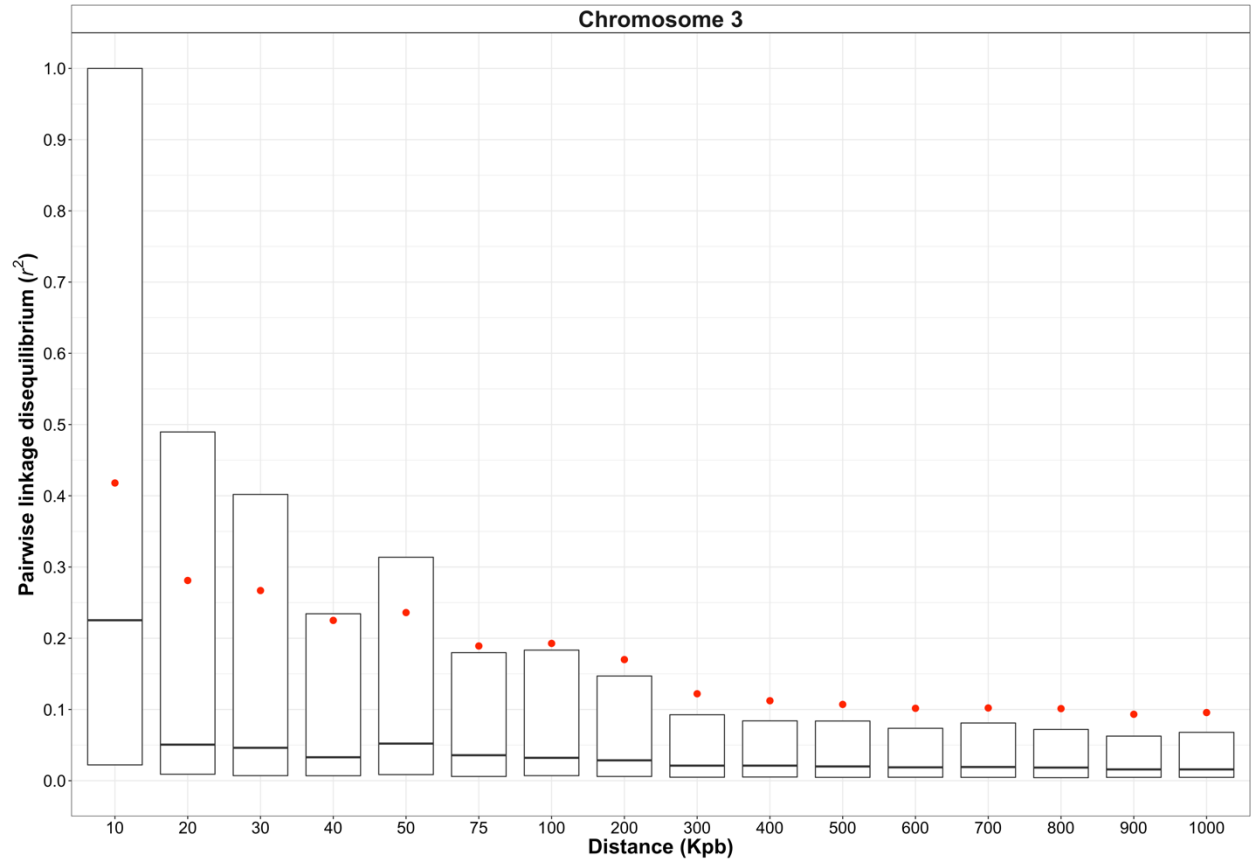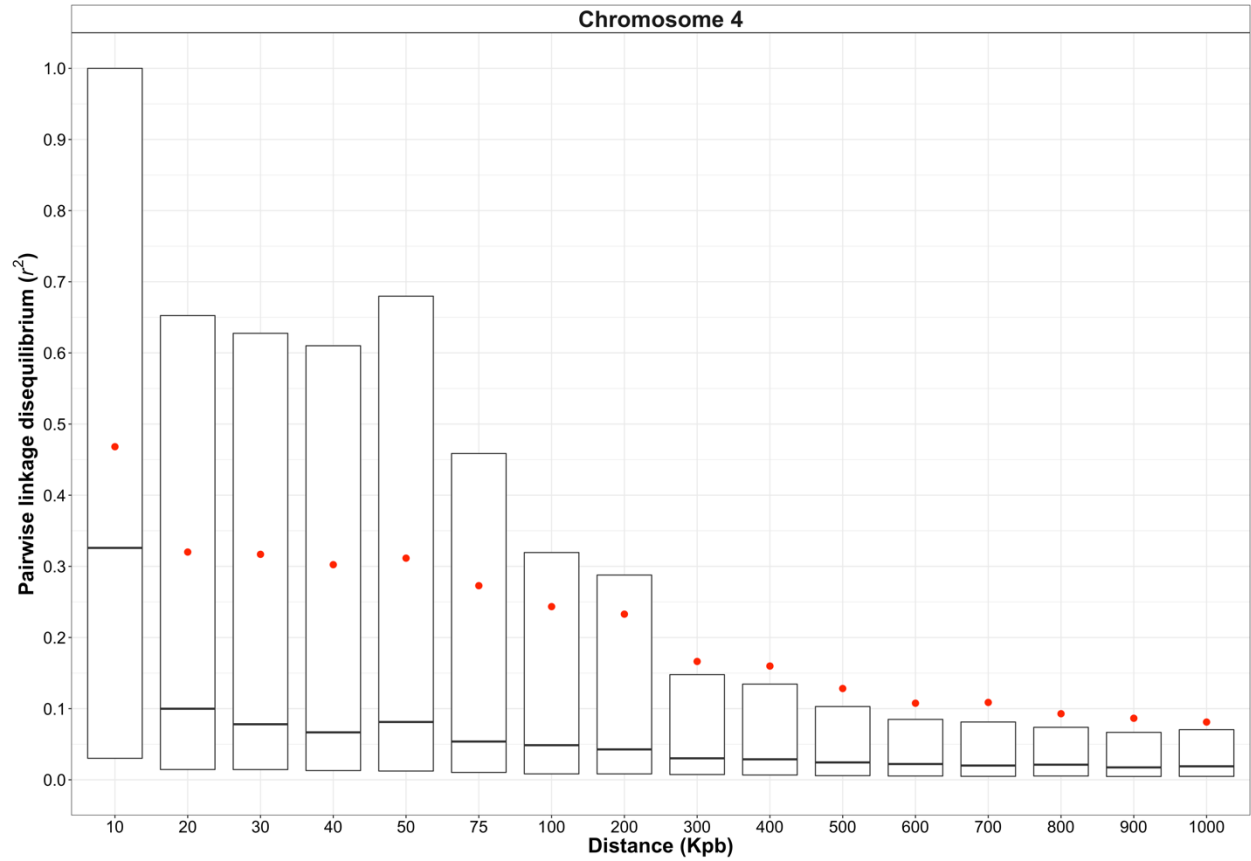

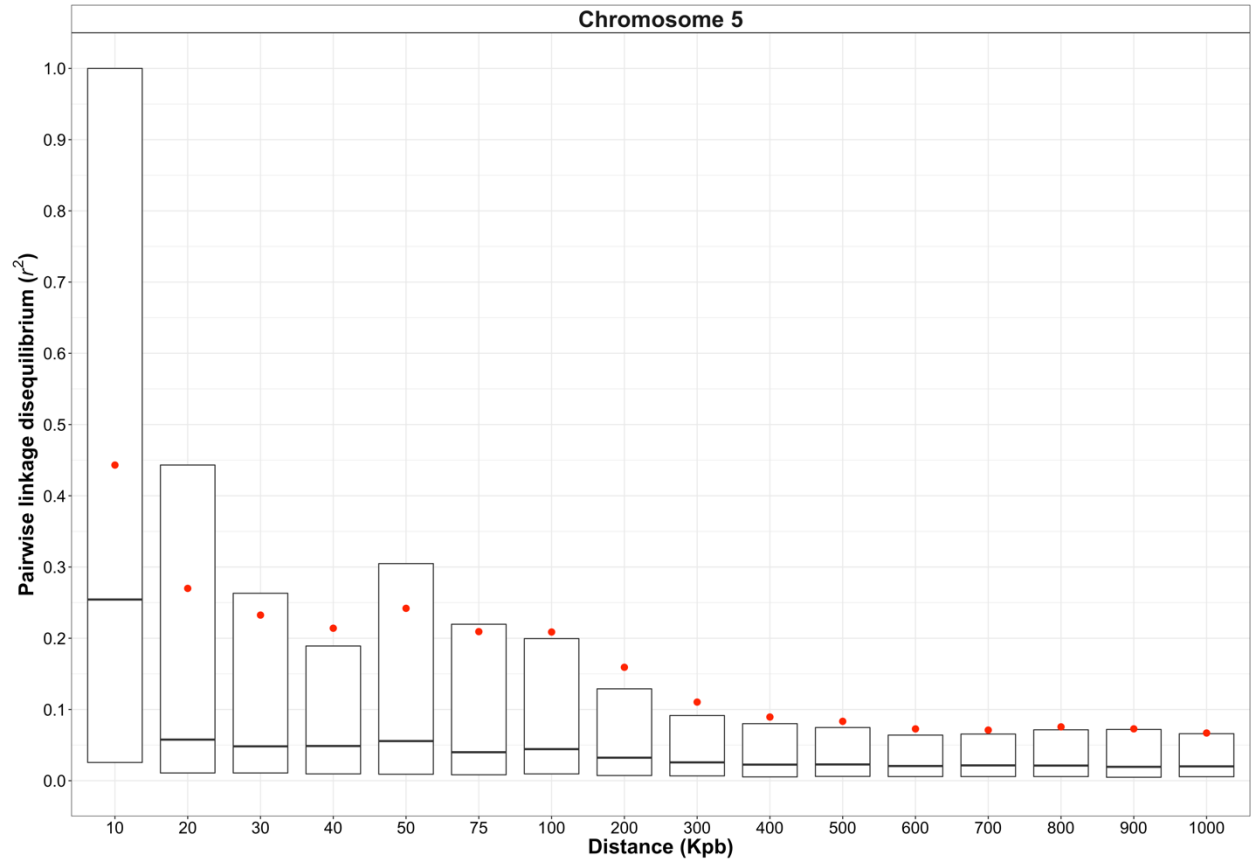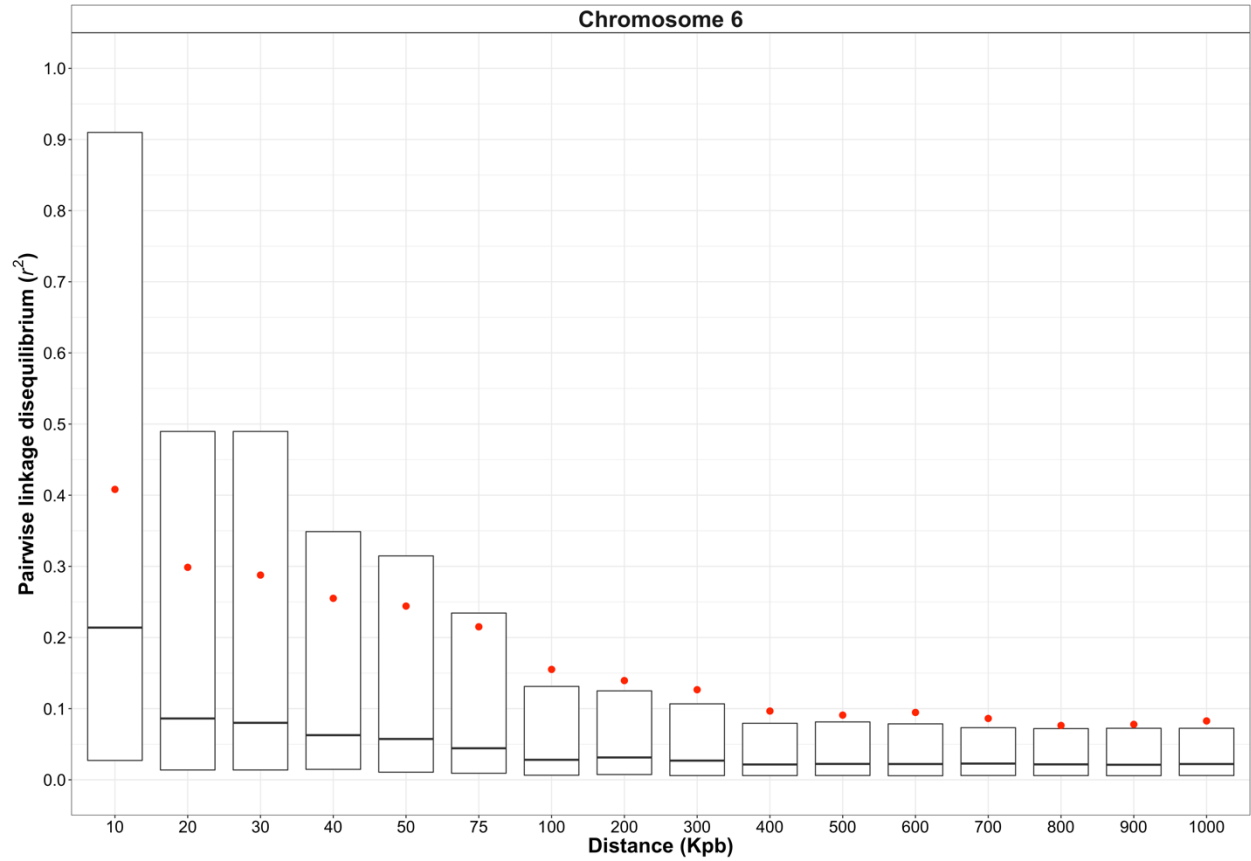

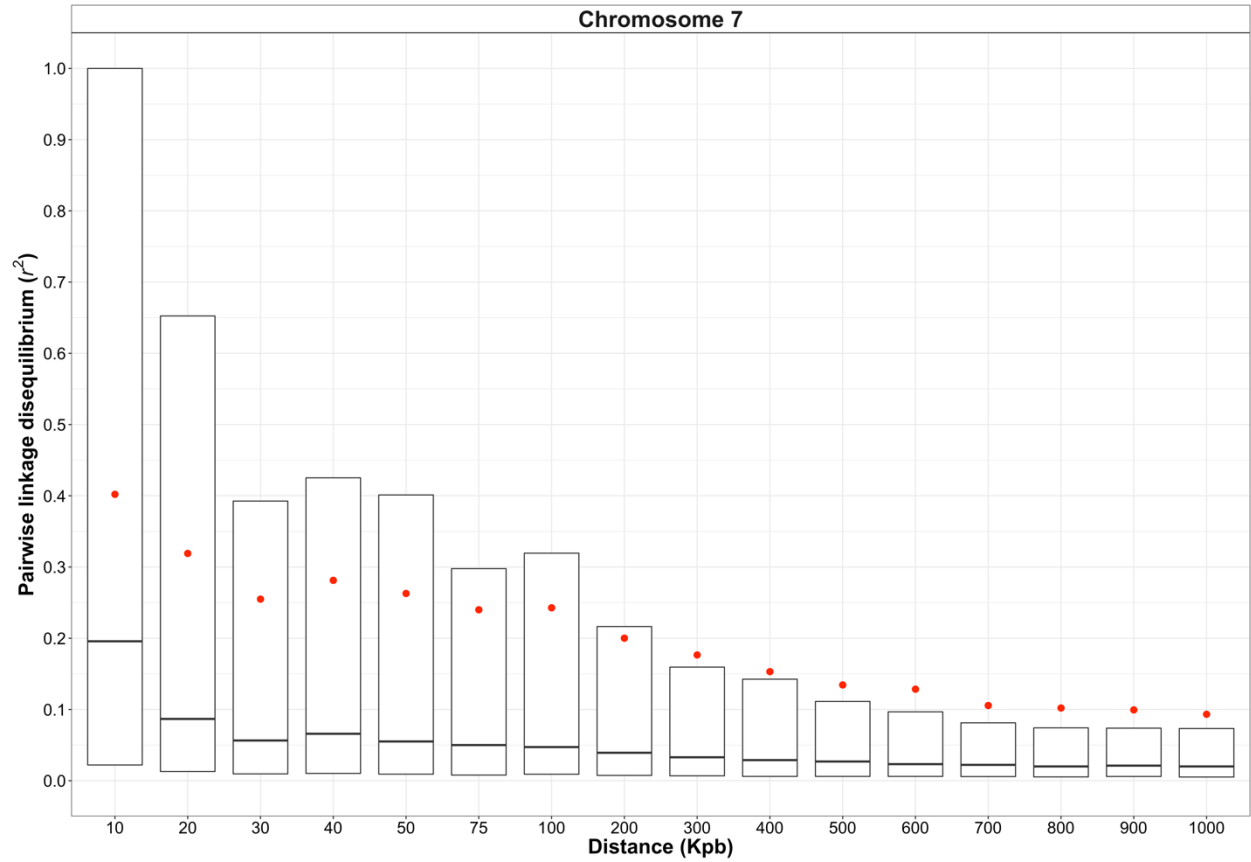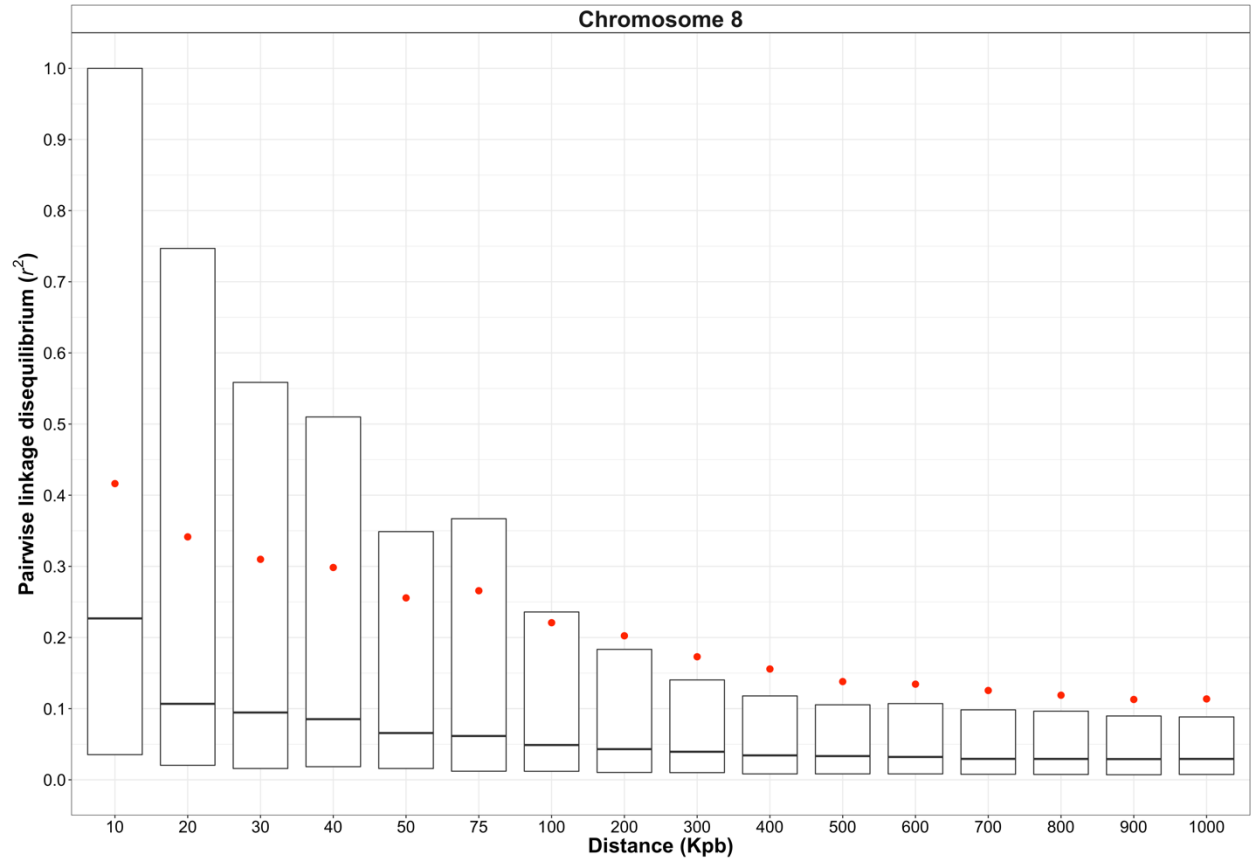

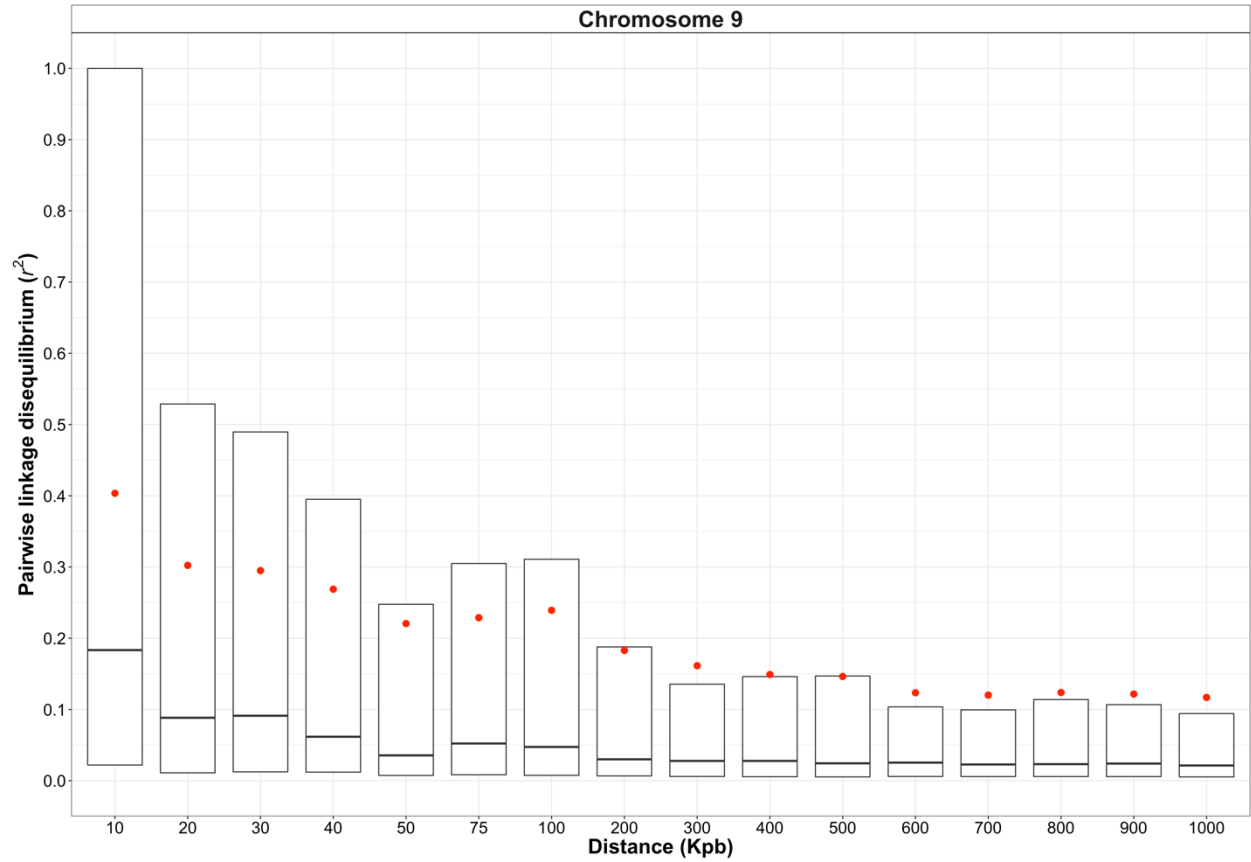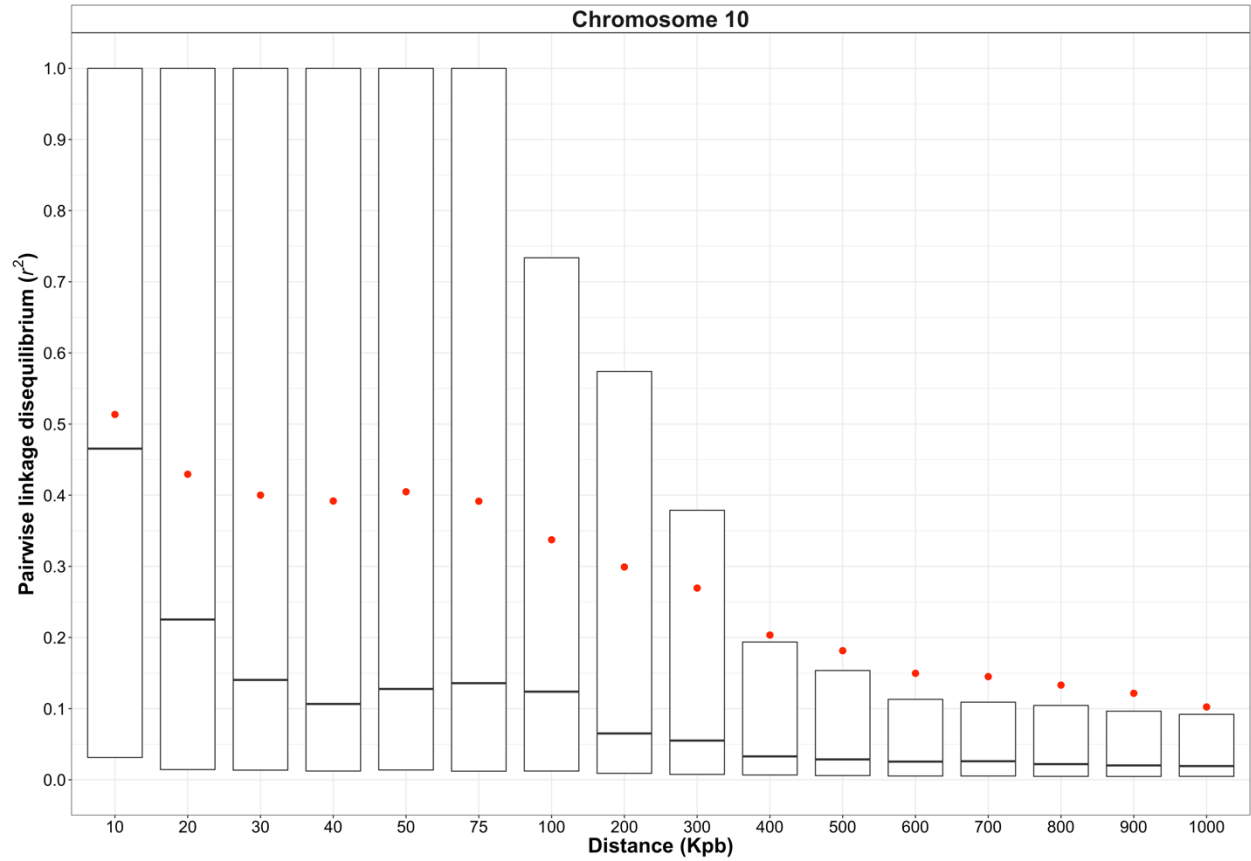

Supplement: 13007_2019_388_MOESM4_ESM.pdf [file 13007_2019_388_MOESM4_ESM.pdf]
